# Supplementary material for: Spatio-temporal coherence of dengue, chikungunya and Zika outbreaks in Merida, Mexico
Source: PubMed Central journal article supplement (PMC5870998; doi:10.1371/journal.pntd.0006298), 2018-03-15
Supplement: pntd.0006298.s001.pdf [file pntd.0006298.s001.pdf]

1

2

### Supplementary Figures

3 **Figure A. Weekly count of DENV symptomatic cases reported to the public health system**

4 **of Merida, Yucatan.** Gray boxes indicate epidemic periods (roman numbers on top), while

5 white boxes indicate non-epidemic periods. Red lines point to the beginning of an epidemic

6 period and green lines indicate the end of the same period. Dashed lines indicate the beginning

7 and end of each calendar year.

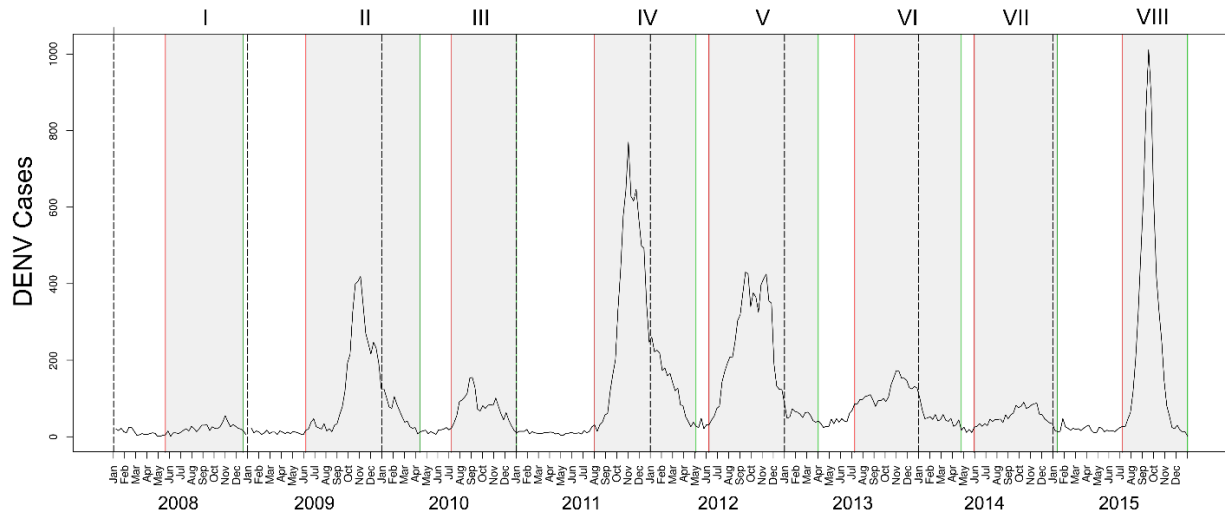

8

9

10

11 **Figure B. Relative Frequency of DENV serotypes isolated in Merida, Yucatan, during**  
12 **2008-2015.**

13

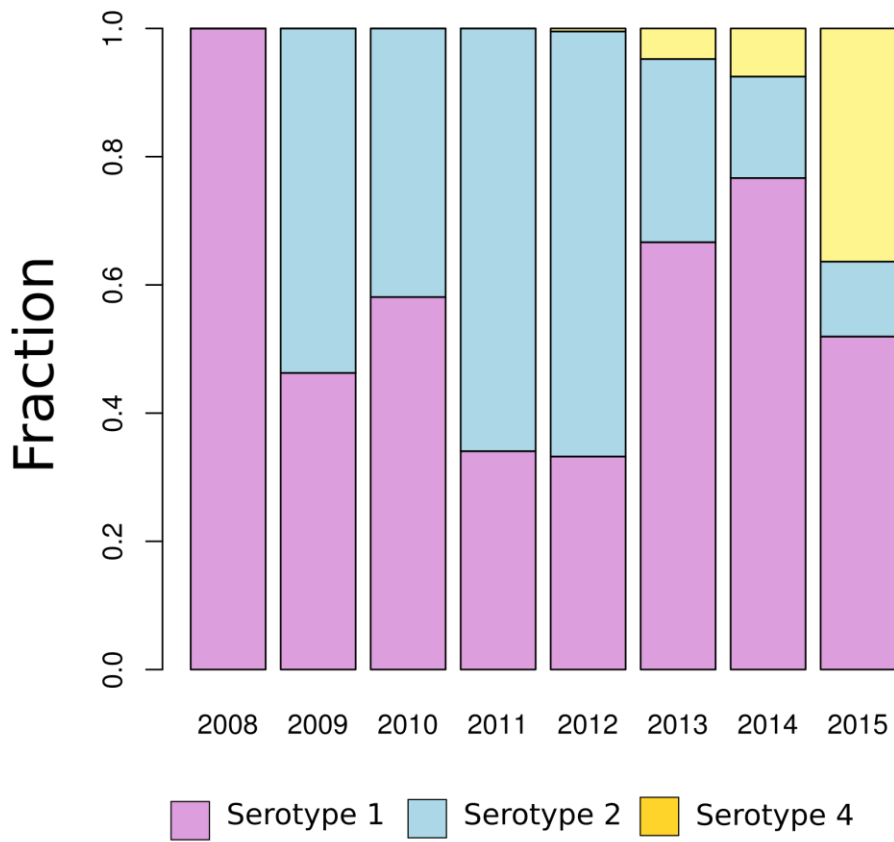

14

15

16 **Figure C: Age-structure of reported DENV cases in the city of Merida, Mexico, for 2008-**  
17 **2015.**

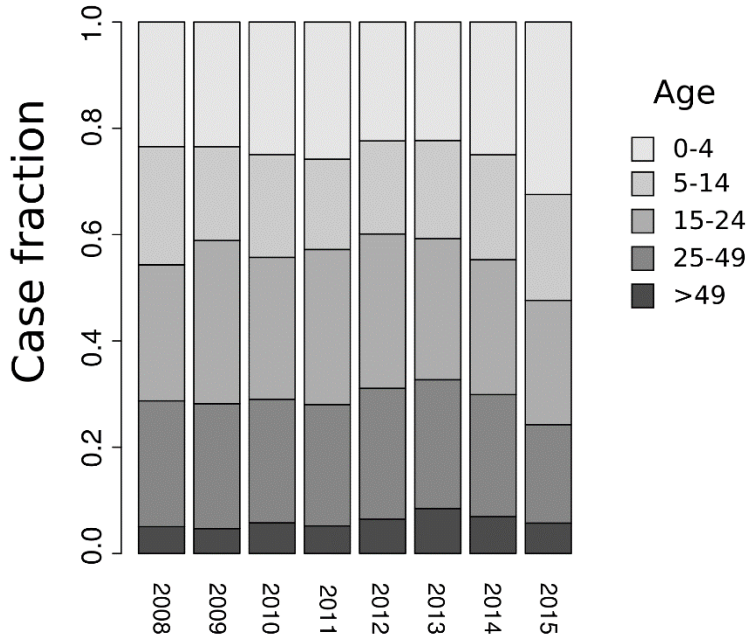

18

19 **Figure D. Standardized DENV case counts by year and census tract for Merida, 2008-2015.**

20

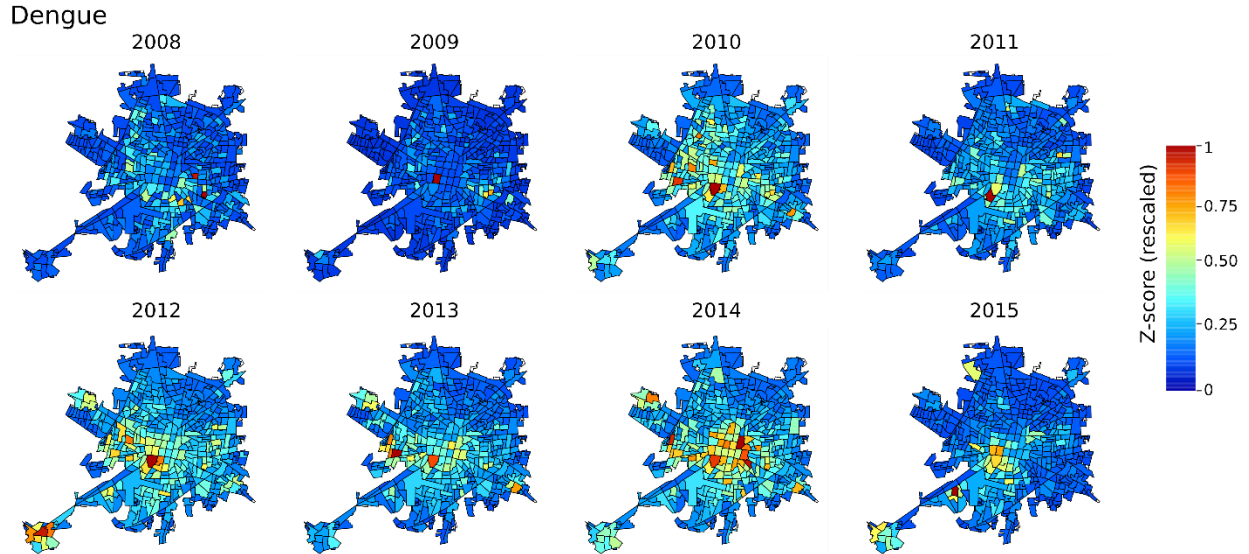

21

22

23

24 **Figure E. Results from the Getis-Ord  $G^*$  statistic test identifying tracts with statistically**  
25 **significant ( $p < 0.05$ ) high standardized case counts for outbreak periods (red polygons).**  
26 Map in lower right shows cumulative count of periods in which a tract was identified as a hot-  
27 spot.

28

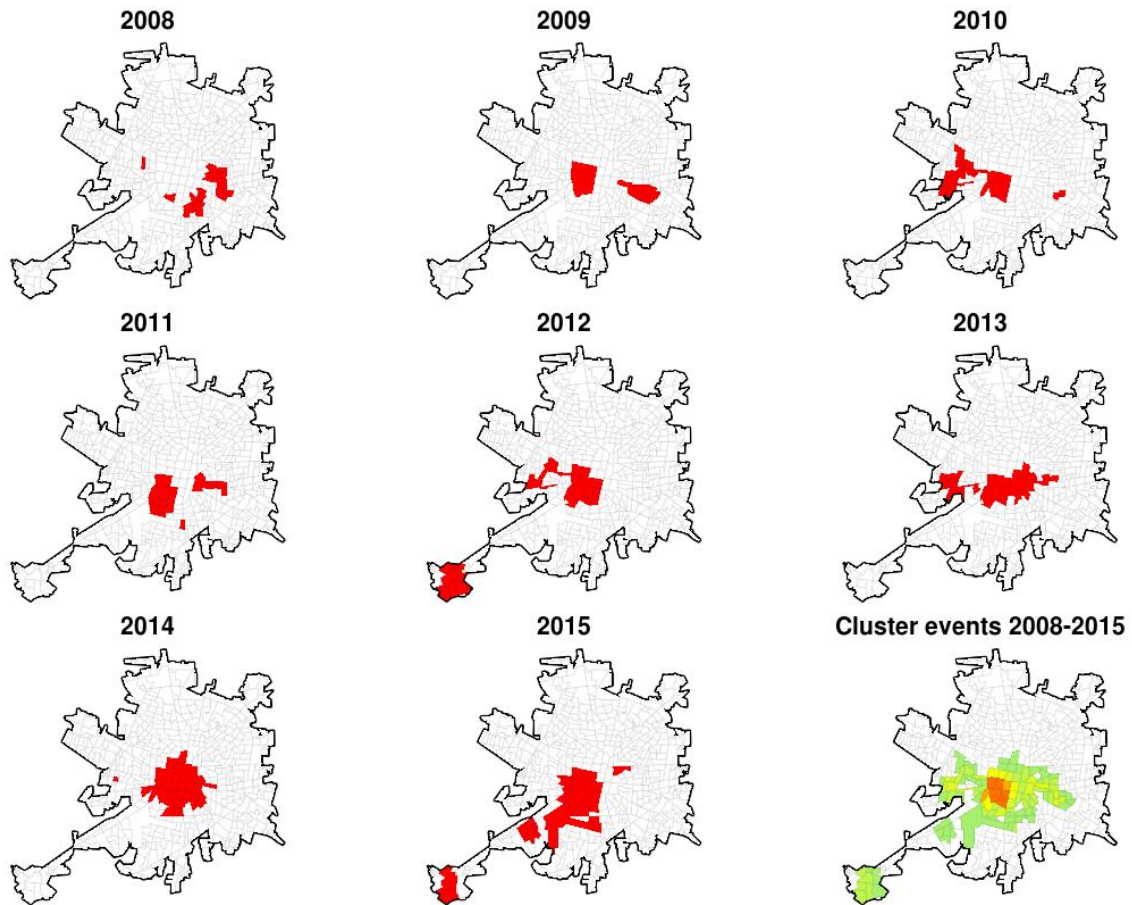

29

30

31 **Figure F. Results from the Getis-Ord  $G^*$  statistic test identifying tracts with statistically**  
32 **significant ( $P < 0.05$ ) high standardized case counts for non-outbreak periods (red polygons).**  
33 Map in lower right shows cumulative count of periods in which a tract was identified as a hot-  
34 spot.

35

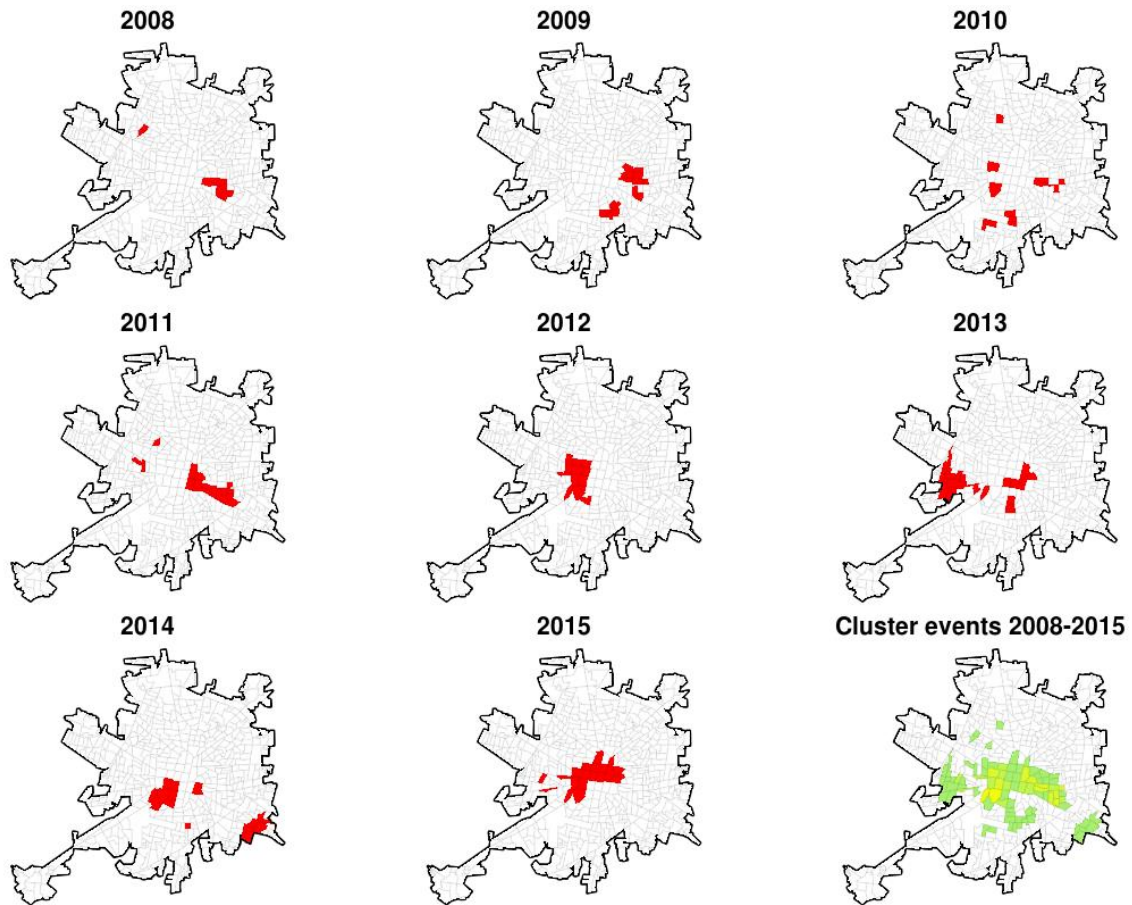

36

37

38

39

40 **Figure G. Time series of weekly case counts for CHIKV (A) and ZIKV (B) in Merida,**  
41 **Mexico.** Location of tracts where the first (green) and the first 10 (red) cases of CHIKV (C) and  
42 ZIKV (D) were reported. Gray shade highlights the persistent 2008-2015 DENV clustering area  
43 of the epidemic periods.

44

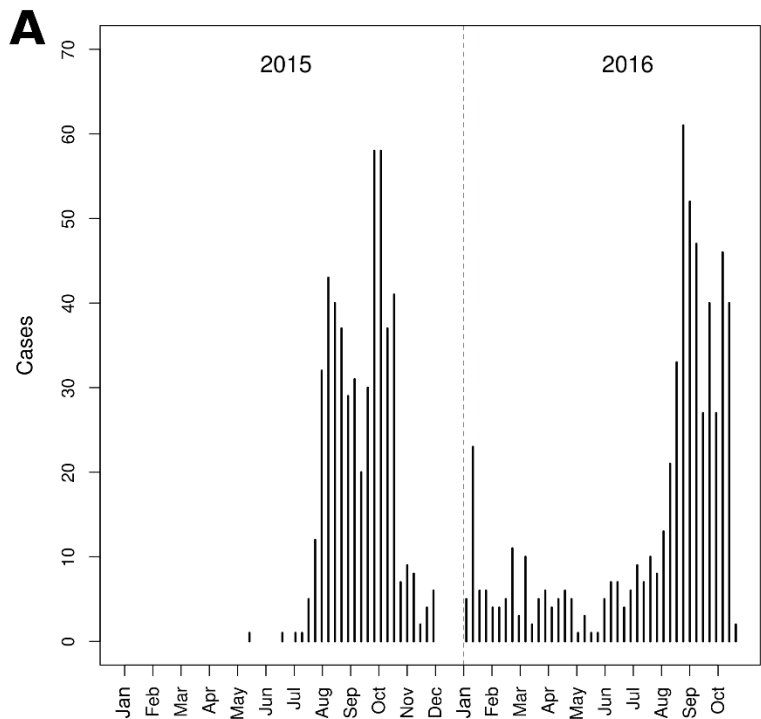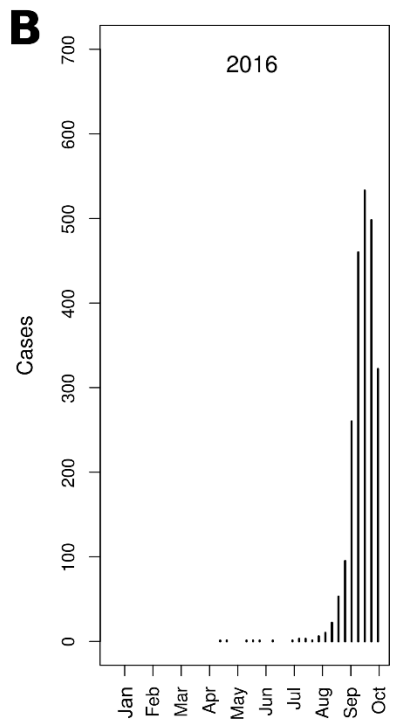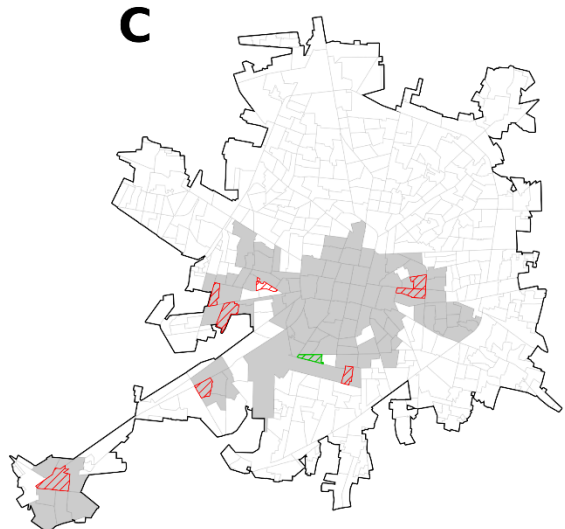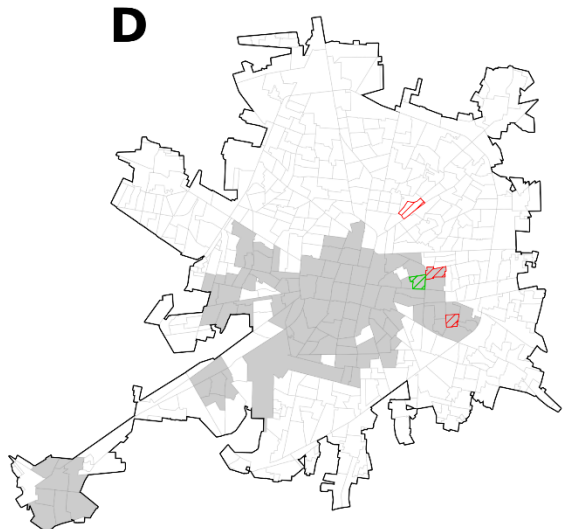



46 **Figure H. Age-structure of reported CHIKV and ZIKV cases in the city of Merida, Mexico,**  
47 **for 2015-2016.**

48

49

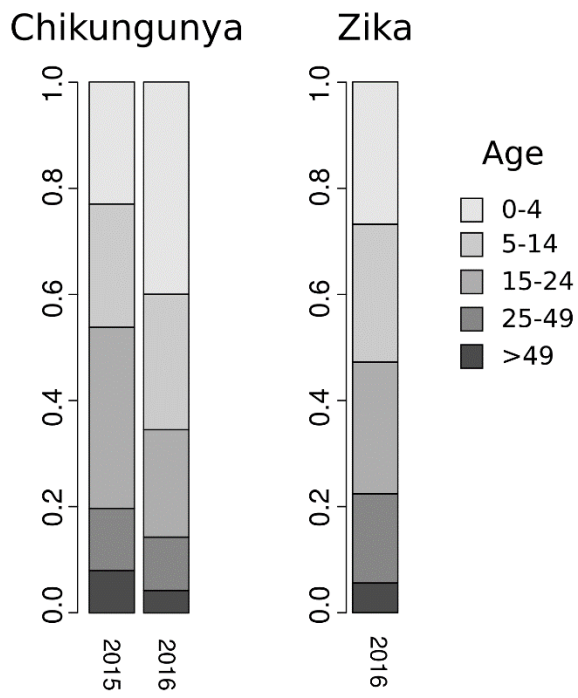

50

51

52
